# Supplementary material for: Toxicity of ten herbicides to the tropical marine microalgae Rhodomonas salina
Source: PubMed Central journal article supplement (PMC7203118; doi:10.1038/s41598-020-64116-y), 2020-05-06
Supplement: 41598_2020_64116_MOESM1_ESM.pdf [file 41598_2020_64116_MOESM1_ESM.pdf]

# **Toxicity of ten herbicides to the tropical marine microalgae *Rhodomonas salina***

Marie C. Thomas<sup>1,2\*</sup>, Florita Flores<sup>1,2</sup>, Sarit Kaserzon<sup>3</sup>, Rebecca Fisher<sup>4</sup> & Andrew P. Negri<sup>1,2</sup>

<sup>1</sup>Australian Institute of Marine Science, Townsville, QLD 4810, Australia

<sup>2</sup>AIMS@JCU: Australian Institute of Marine Science, College of Marine and Environmental Sciences, James Cook University, Townsville, Queensland 4811, Australia

<sup>3</sup>Queensland Alliance for Environmental Health Sciences (QAEHS), The University of Queensland, Woolloongabba, QLD 4102, Australia

<sup>4</sup>Australian Institute of Marine Science, Indian Ocean Marine Research Centre, University of Western Australia, Crawley, WA 6009, Australia

\* [m.thomas@aims.gov.au](mailto:m.thomas@aims.gov.au)

**Table S-1. Summary of the chemical properties of herbicides used in this study, stock solutions, and nominal and measured concentrations.** A solvent carrier (SC) was used in the diuron (ethanol), simazine (ethanol), and haloxyfop (DMSO) toxicity test. The solvents were chosen based on their relative ability to dissolve the herbicides at the concentrations required. Seawater controls (SWC) were used for the remaining tests. Log Kow values from PubChem (<https://pubchem.ncbi.nlm.nih.gov/>). Solubilities in water (at 20 °C) are compiled using the Pesticide Properties Database (<https://sitem.herts.ac.uk/aeru/ppdb/>). Stock solutions were prepared in milli-Q water or filtered seawater (FSW). Measured concentrations are the average of initial and final concentration in each test. All concentrations in  $\mu\text{g L}^{-1}$ .

| Herbicide                                   | Solubility<br>( $\text{mg L}^{-1}$ ) | log KOW | Stock<br>solution<br>( $\text{mg L}^{-1}$ ) | FSW/milli-Q | Nominal concentration                   |                                            | Measured concentration                                           |                                                          |
|---------------------------------------------|--------------------------------------|---------|---------------------------------------------|-------------|-----------------------------------------|--------------------------------------------|------------------------------------------------------------------|----------------------------------------------------------|
|                                             |                                      |         |                                             |             | Growth test                             | PAM test                                   | Growth test                                                      | PAM test                                                 |
| <i>Inhibition of photosynthesis at PSII</i> |                                      |         |                                             |             |                                         |                                            |                                                                  |                                                          |
| Diuron                                      | 35.6                                 | 2.68    | 10                                          | milli-Q     | SWC; SC; 0.3; 1; 2;<br>4; 6; 10; 20     | SWC; SC; 0.5;<br>1; 2; 4; 6; 10;<br>20     | SWC; SC; 0.30;<br>0.98; 1.97; 3.93;<br>5.90; 9.83; 19.97         | SWC; SC; 0.49;<br>0.98; 1.97; 3.93;<br>5.90; 9.83; 19.97 |
| Metribuzin                                  | 1165                                 | 1.7     | 10                                          | milli-Q     | SWC; 0.3; 1; 3; 10;<br>30; 100          | SWC; 0.3; 1; 3;<br>10; 30; 100             | SWC; 0.27; 0.88;<br>2.65; 8.85; 26.55;<br>88.49                  | SWC; 0.27; 0.88;<br>2.65; 8.85; 26.55;<br>88.49          |
| Hexazinone                                  | 33000                                | 1.85    | 5                                           | milli-Q     | SWC; 1; 3; 6; 12; 25;<br>75             | SWC; 1; 3; 6;<br>12; 25; 75                | SWC; 0.86; 2.57;<br>5.15; 10.3; 21.5;<br>64.4                    | SWC; 0.86; 2.57;<br>5.15; 10.3; 21.5;<br>64.4            |
| Bromacil                                    | 815                                  | 2.11    | 10                                          | milli-Q     | SWC; 0.3; 1; 3; 10;<br>30; 100; 300     | SWC; 0.3; 1; 3;<br>10; 30; 100;<br>300     | SWC; 0.26; 0.86;<br>2.57; 8.56; 25.7;<br>85.6; 257               | SWC; 0.26; 0.86;<br>2.57; 8.56; 25.7;<br>85.6; 257       |
| Tebuthiuron                                 | 2500                                 | 1.79    | 10                                          | milli-Q     | SWC; 1; 3; 10; 30;<br>100; 300          | SWC; 1; 3; 10;<br>30; 100; 300             | SWC; 0.98; 2.94;<br>9.80; 29.40;<br>98.00; 294                   | SWC; 0.98; 2.94;<br>9.80; 29.40; 98.00;<br>294           |
| Simazine                                    | 5                                    | 2.18    | 10                                          | FSW         | SWC; SC; 1; 3; 10;<br>30; 100; 300; 600 | SC; 1; 3; 10;<br>30; 100; 300;<br>600      | SWC; SC; 0.62;<br>1.86; 6.21; 18.62;<br>62.07; 186.20;<br>372.41 | SC; 0.62; 1.86;<br>6.21; 18.62; 62.07;<br>186.20; 372.41 |
| Propazine                                   | 8.6                                  | 2.93    | 8                                           | FSW         | SWC; 1; 3; 10; 30;<br>60; 100; 200; 300 | SWC; 1; 3; 10;<br>30; 60; 100;<br>200; 300 | SWC; 0.65; 1.96;<br>6.53; 19.6; 39.2;<br>65.3; 131; 196          | SWC; 0.65; 1.96;<br>6.53; 19.6; 39.2;<br>65.3; 131; 196  |

*Inhibition of acetohydroxyacid synthase (AHAS)*

|          |      |       |       |     |                                                                 |                                                            |                                                                 |                                                      |
|----------|------|-------|-------|-----|-----------------------------------------------------------------|------------------------------------------------------------|-----------------------------------------------------------------|------------------------------------------------------|
| Imazapic | 2230 | 0.393 | 2,000 | FSW | SWC; 10,000;<br>30,000; 60,000;<br>100,000; 250,000;<br>500,000 | SWC; 30,000;<br>60,000;<br>100,000;<br>250,000;<br>500,000 | SWC; 15,935;<br>47,806; 95,611;<br>159,352;<br>398,380; 796,760 | SWC; 47,806;<br>95,611; 159,352;<br>398,380; 796,760 |
|----------|------|-------|-------|-----|-----------------------------------------------------------------|------------------------------------------------------------|-----------------------------------------------------------------|------------------------------------------------------|

*Inhibition of acetyl-CoA carboxylase (ACCase)*

|           |     |    |     |     |                                                           |                                                         |                                                        |                                                |
|-----------|-----|----|-----|-----|-----------------------------------------------------------|---------------------------------------------------------|--------------------------------------------------------|------------------------------------------------|
| Haloxyfop | 1.6 | NA | 100 | FSW | SWC; SC; 2,000;<br>4,000; 6,000; 8,000;<br>10,000; 16,000 | SC; 2,000;<br>4,000; 6,000;<br>8,000; 10,000;<br>16,000 | SWC; SC; 464;<br>927; 1,391;<br>1,854; 2,318;<br>3,708 | SC; 464; 927;<br>1,391; 1,854; 2,318;<br>3,708 |
|-----------|-----|----|-----|-----|-----------------------------------------------------------|---------------------------------------------------------|--------------------------------------------------------|------------------------------------------------|

*Action like indole acetic acid (plant hormone) promoting uncontrolled growth*

|       |       |      |     |     |                                                                      |                                                             |                                                       |                                              |
|-------|-------|------|-----|-----|----------------------------------------------------------------------|-------------------------------------------------------------|-------------------------------------------------------|----------------------------------------------|
| 2,4-D | 23180 | 2.81 | 600 | FSW | SWC; 1,000; 3,000;<br>10,000; 30,000;<br>100,00; 300,000;<br>600,000 | SWC; 1,000;<br>3,000; 10,000;<br>30,000; 100,00;<br>300,000 | SWC; 931; 2,793;<br>9,309; 27,928;<br>93,093; 279,279 | SWC; 931; 2,793;<br>9,309; 27,928;<br>93,093 |
|-------|-------|------|-----|-----|----------------------------------------------------------------------|-------------------------------------------------------------|-------------------------------------------------------|----------------------------------------------|

---

**Table S-2.** Slope and goodness of fit of concentration-response curves for specific growth rate (SGR) and effective quantum yield ( $\Delta F/F_m'$ ) data from Fig. 1 Sigmoidal, 4 parameter model. NA indicates values could not be calculated.

| Herbicide   | SGR   |                | $\Delta F/F_m'$ |                |
|-------------|-------|----------------|-----------------|----------------|
|             | Slope | R <sup>2</sup> | Slope           | R <sup>2</sup> |
| Diuron      | 1.9   | 0.99           | 1.6             | 0.99           |
| Metribuzin  | 1.4   | 0.99           | 1.4             | 0.99           |
| Hexazinone  | 2.9   | 0.98           | 1.9             | 0.99           |
| Bromacil    | 1.6   | 0.99           | 1.2             | 0.99           |
| Tebuthiuron | 1.6   | 0.99           | 1.2             | 0.99           |
| Simazine    | 1.4   | 0.99           | 1.2             | 0.99           |
| Propazine   | 1.5   | 0.97           | 1.2             | 0.99           |
| Imazapic    | 1.9   | 0.97           | NA              | NA             |
| Haloxfop    | NA    | NA             | NA              | NA             |
| 2,4-D       | NA    | NA             | NA              | NA             |
